# Supplementary material for: Attentional Bias in Humans Toward Human and Bonobo Expressions of Emotion
Source: PubMed Central journal article supplement (PMC10358346; doi:10.1177/14747049211032816), 2021-07-28

## Supplements

Figure 1

Examples of stimuli per emotion category depicting bonobos.

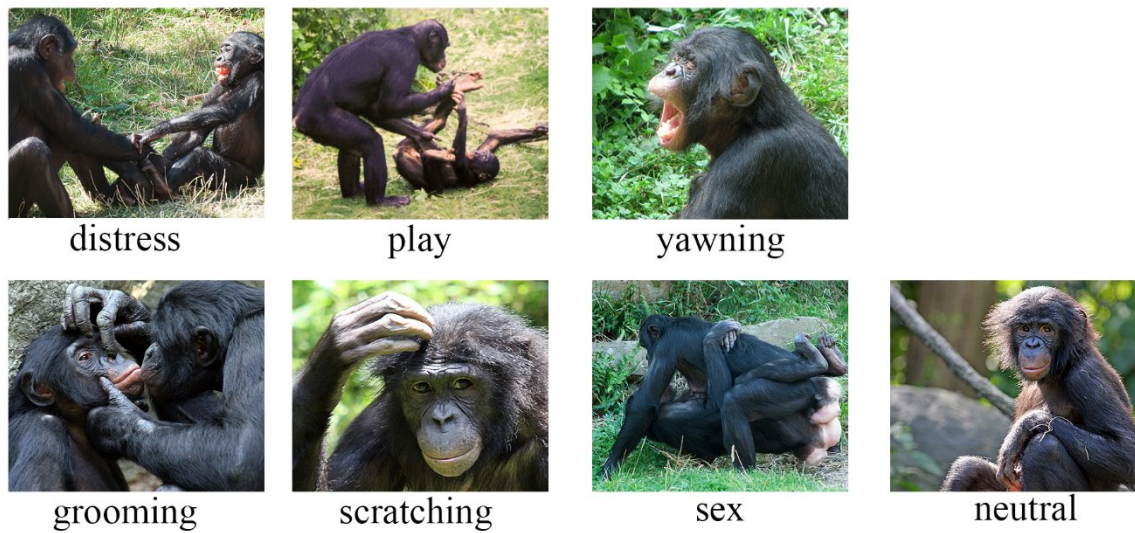

Figure 2

Examples of stimuli per emotion category depicting humans and used in the task with adults and children.

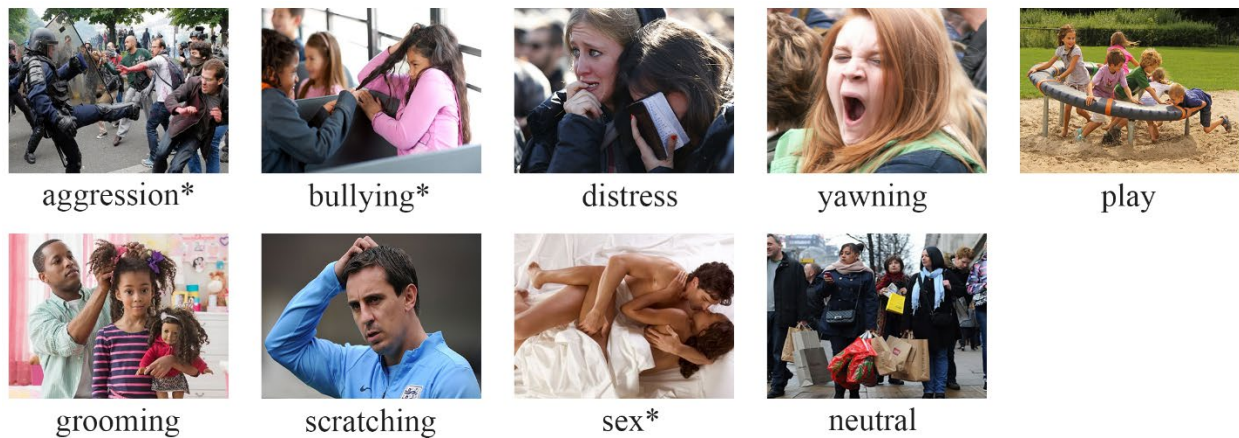

Note. \*Aggression was only used in adults, and replaced by bullying in the child version of the task. Sex was removed from the child version.

**Figure 3.**

*Picture of a child performing one of the dot-probe tasks in the zoo*

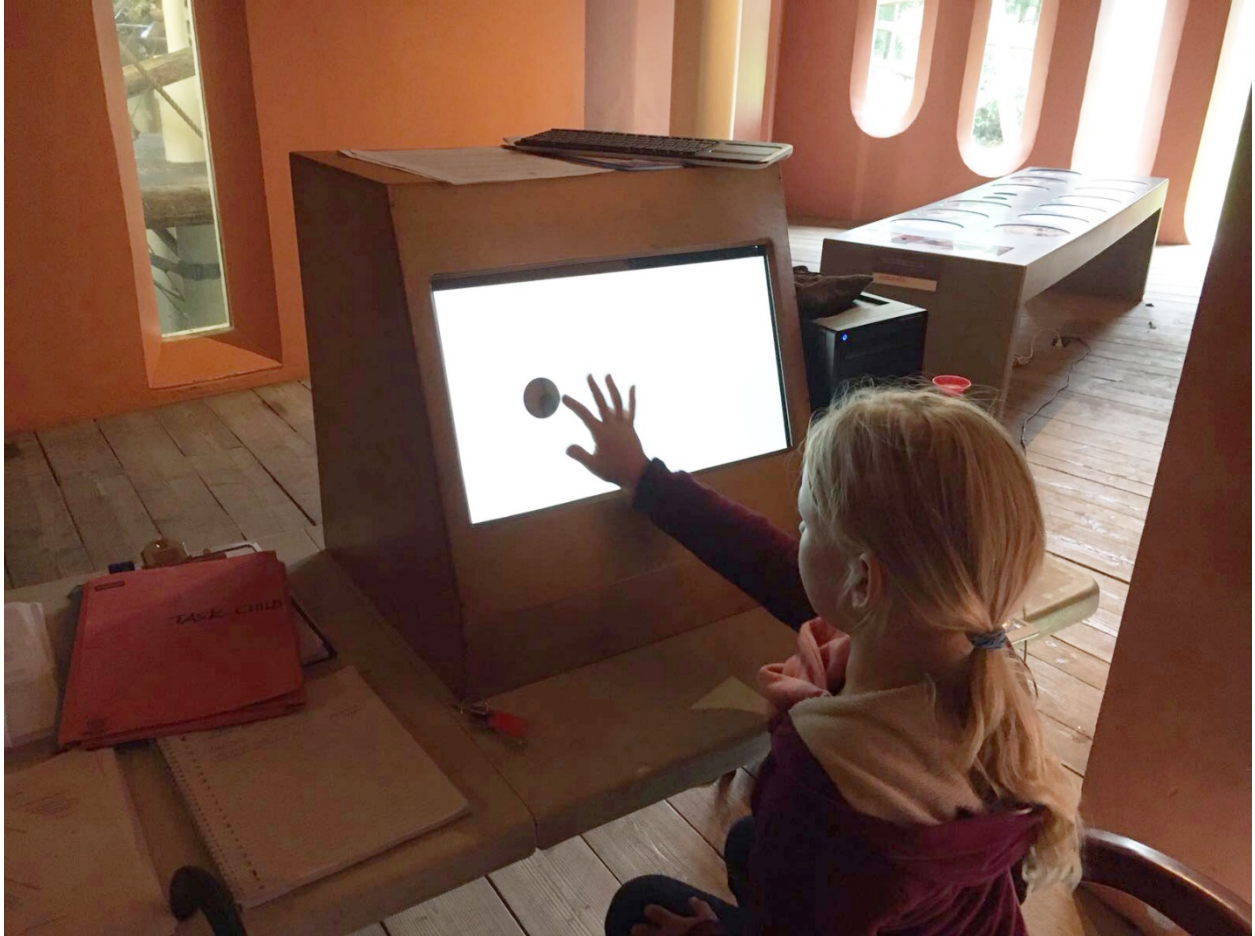

Supplement: sj-pdf-1-evp-10.1177_14747049211032816.pdf [file sj-pdf-1-evp-10.1177_14747049211032816.pdf]
